# Supplementary material
Source: MDPI journal article supplement (https://www.mdpi.com/search?q=materials-12-03942)

Supplementary materials

# Use of Low-Cost Magnetic Materials Containing Waste Derivatives for the (Photo)-Fenton Removal of Organic Pollutants

Paola Calza <sup>1,\*</sup>, Jessica Di Sarro <sup>1</sup>, Giuliana Magnacca <sup>1,2</sup>, Alessandra Bianco Prevot <sup>1,\*</sup> and Enzo Laurenti <sup>1</sup>

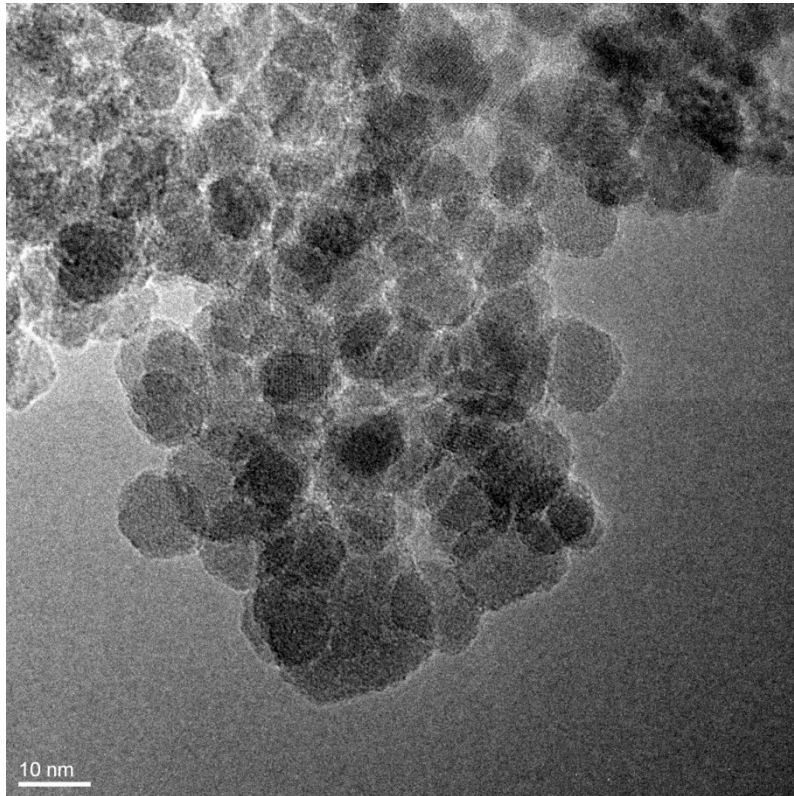

**Figure S1.** TEM image of nanoparticles.

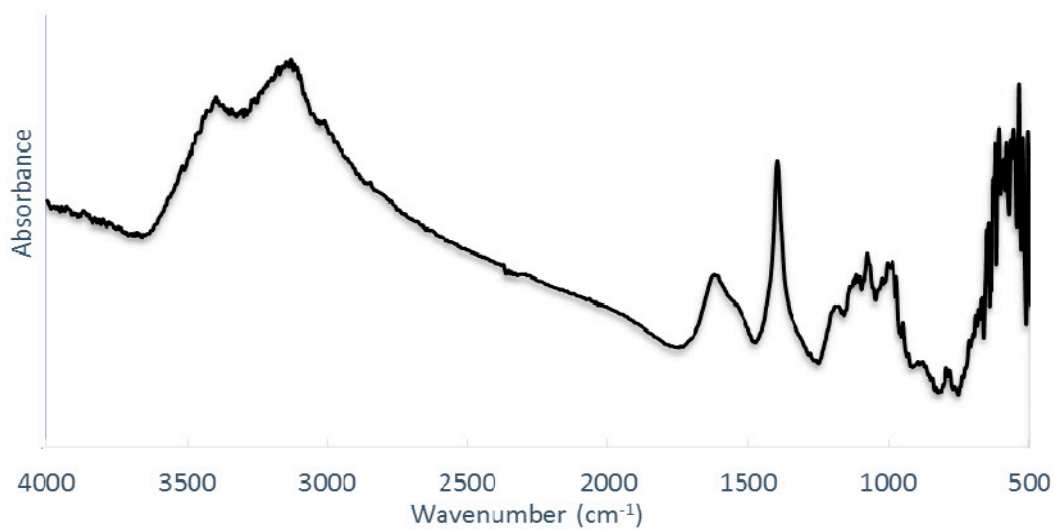

Figure S2. IR spectrum of nanoparticles dispersed in KBr.

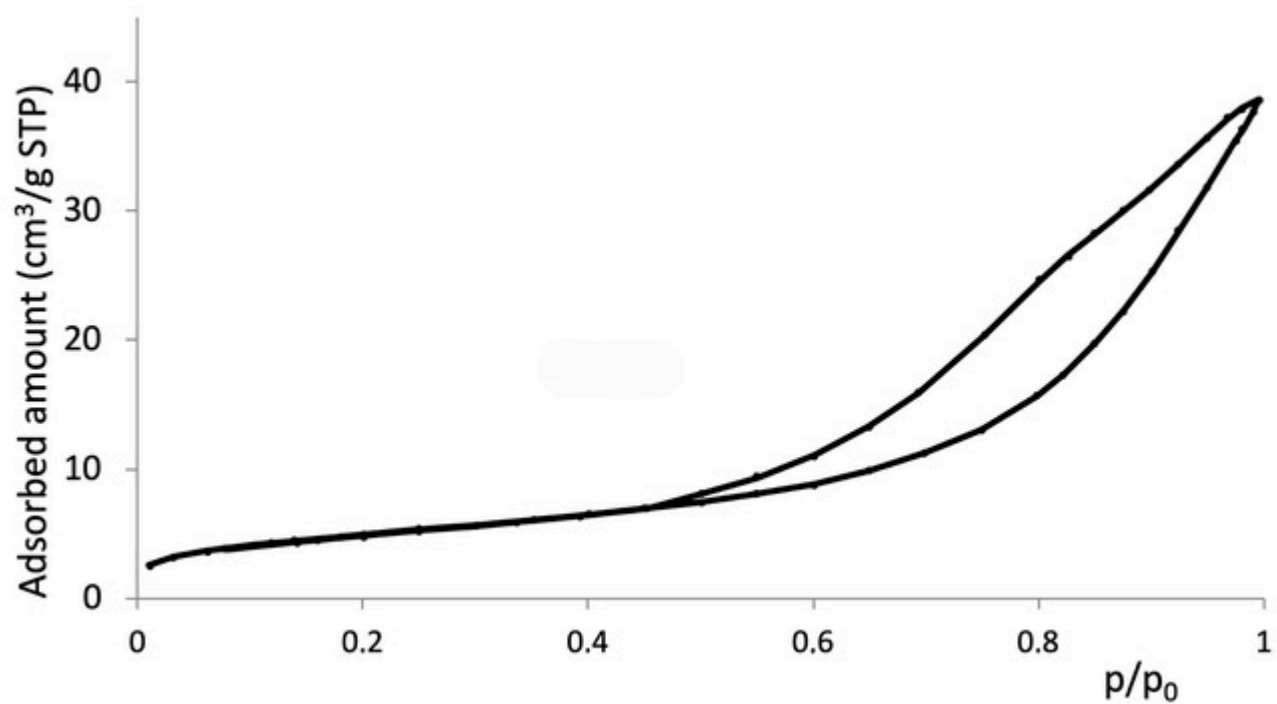

Figure S3. Adsorption isotherm of 77 K N<sub>2</sub>.

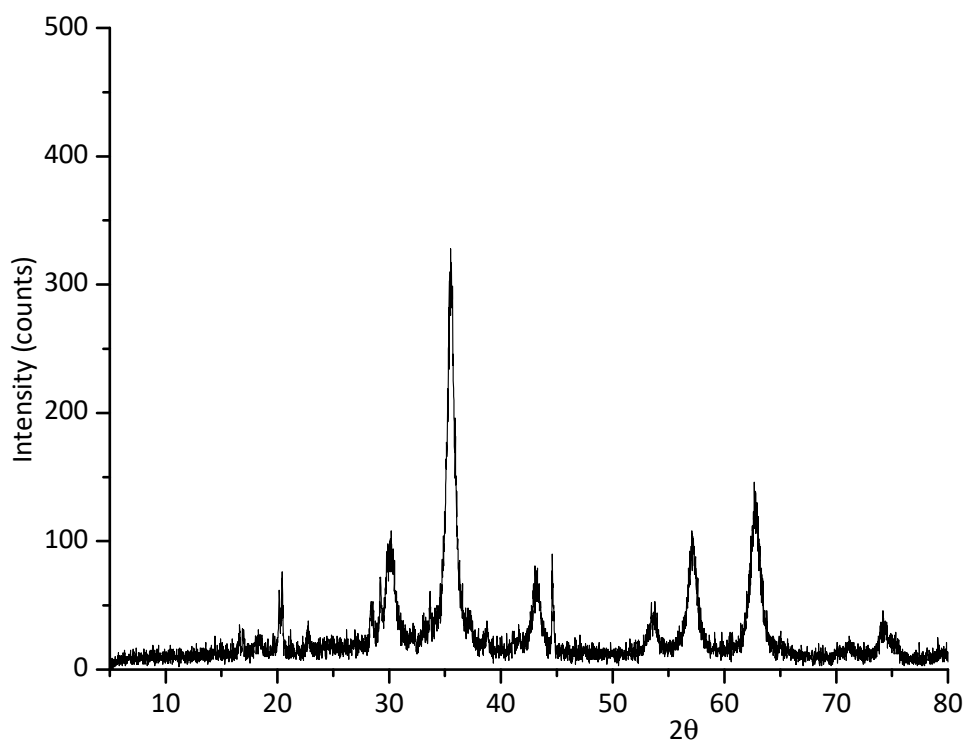

**Figure S4.** XRD diffractogram reporting the principal signal of  $\text{Fe}_3\text{O}_4$  and impurities of  $\text{NH}_4\text{NO}_3$  derived from the synthesis procedure.

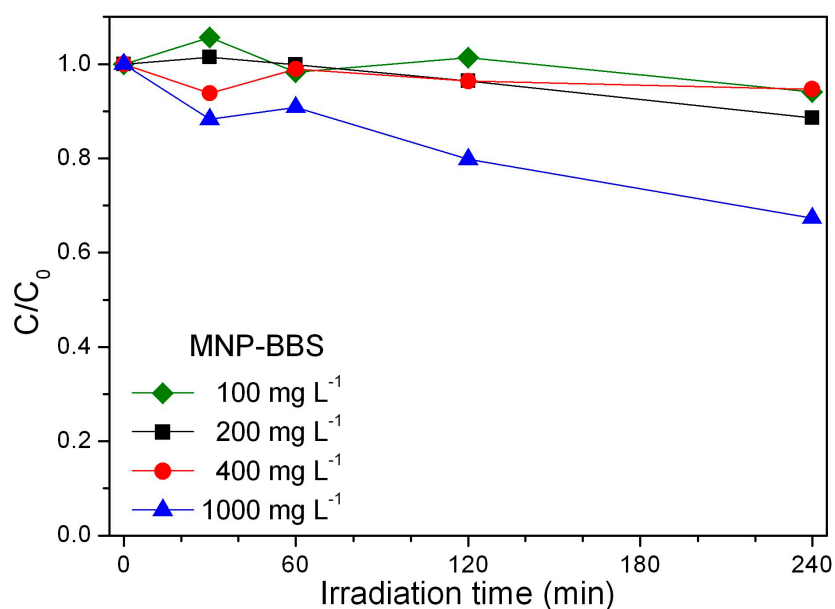

**Figure S5.** Degradation profiles of phenol ( $10 \text{ mg L}^{-1}$ ) in the presence of different MNP-BBS concentrations.

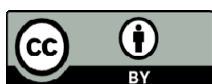

Supplement: s001 [file materials-12-03942-s001.pdf]
